1  
2  
3  
4  
5  
6  
7  
8  
9  
10  
11  
12  
13  
14  
15  
16  
17  
18  
19

**Evaluating Quantitative and Functional MRI As Potential Techniques to Identify the Subdivisions in the Human Lateral Geniculate Nucleus**

Irem Yildirim<sup>1\*</sup>, Khan Hekmatyar<sup>2</sup> and Keith A. Schneider<sup>1,2</sup>

<sup>1</sup>Department of Psychological and Brain Sciences, University of Delaware, Newark, DE, USA

<sup>2</sup>Center for Biomedical and Brain Imaging, University of Delaware, Newark, DE, USA

**Author Note**

\*To whom correspondence should be addressed. Email: [yildirim@udel.edu](mailto:yildirim@udel.edu)

Author contributions. IY: Conceptualization, Formal analysis, Investigation, Methodology, Software, Visualization, Writing - original draft, Writing - review & editing; KH: Methodology, Resources; KAS: Conceptualization, Methodology, Software, Writing - review & editing, Supervision, Funding acquisition.

27 **Abstract**

28 Segmenting the magnocellular (M) and parvocellular (P) divisions of the human lateral  
29 geniculate nucleus (LGN) has been challenging yet remains an important goal because the LGN  
30 is the only place in the brain where these two information streams are spatially disjoint and can  
31 be studied independently. Previous research used the amplitude of responses to different types of  
32 stimuli to separate M and P regions (Denison et al., 2014; Zhang et al., 2015). However, this  
33 method is confounded because the hilum region of the LGN exhibits greater response amplitudes  
34 to all stimuli and can be mistaken for the M subdivision (DeSimone & Schneider, 2019).  
35 Therefore, we have employed two independent methodologies that do not rely upon the  
36 functional response properties of the M and P neurons to segment the M and P regions: 1)  
37 structural quantitative MRI (qMRI) at 3T to measure the T1 relaxation time, and 2) monocular  
38 and dichoptic functional MRI (fMRI) procedures to measure eye-specific responses. Our qMRI  
39 results agreed with the anatomical expectations, identifying M regions on the ventromedial  
40 surface of the LGN. The monocular fMRI procedure was better than the dichoptic condition to  
41 identify the eye-dominance signals. Both procedures revealed significant right eye bias, and  
42 neither could reliably identify the first M layer of the LGN. These findings indicated that the  
43 qMRI methods are promising whereas the functional identification of contralateral layers  
44 requires further refinement.

45 *Keywords:* lateral geniculate nucleus, magnocellular, parvocellular, quantitative MRI, functional  
46 MRI, monocular layers

47 *Highlights:*

- 48 • T1 parameter in qMRI segregates M and P regions of LGN in individual subjects at 3T.  
49 • Eye-specific voxels in LGN respond more strongly to monocular than dichoptic viewing.  
50 • Clusters of eye-specific regions but not layers can be separated at 1.5 mm resolution.

51 **1. Introduction**

52 The LGN is the visual relay in the thalamus (Nassi & Callaway, 2009; Skalicky, 2016). It  
53 receives projections from retinal ganglion cells, projects primarily to the primary visual cortex  
54 (V1), and also receives massive feedback from V1. It has a laminar structure, with typically six  
55 monocular layers in humans, receiving input alternatingly from the contralateral or ipsilateral eye  
56 (Figure 1a). Specifically, Layers 2, 3, and 5 consist of ipsilateral eye neurons while Layers 1, 4,  
57 and 6 are contralateral eye neurons. The four dorsal layers (Layers 3 to 6) are composed of  
58 parvocellular (P) neurons while the two ventral layers (Layers 1 and 2) are composed of  
59 magnocellular (M) neurons (Figure 1b), receiving input from the midget and parasol ganglion  
60 cells in the retina respectively. The M and P neurons in LGN differ in their functional roles  
61 (Maunsell, 1992; Merigan & Maunsell, 1993). The M neurons are specialized to encode coarse  
62 and transient characteristics, such as luminance (Shapley & Perry, 1986) and temporal frequency  
63 of a signal (Derrington & Lennie, 1984), while the P neurons encode detailed and sustained  
64 characteristics such as color and form (Livingstone & Hubel, 1988).

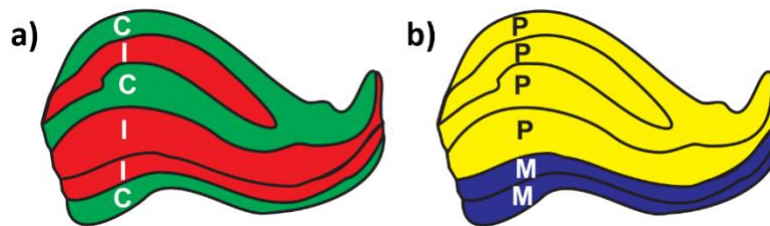

65

66 **Figure 1.** The structure of the lateral geniculate nucleus. M = Magnocellular, P = Parvocellular,  
67 C = Contralateral, I = Ipsilateral. Tracings were generated based on Andrews et al. (1997).

68

69

70 The M and P pathways are of considerable interest for their roles in the mechanisms of  
71 visual perception and consciousness (Breitmeyer, 2014; Denison & Silver, 2012; Milner, 2012)  
72 and in clinical disorders such as dyslexia (Stein, 2001; Stein & Walsh, 1997) and schizophrenia  
(e.g., Butler & Javitt, 2005; Schechter et al., 2003). Studying these pathways independently,

73 however, has been challenging due to the intermixing of the two pathways starting in V1 (Aleci  
74 & Belcastro, 2016; Merigan & Maunsell, 1993). In the LGN, the M and P neurons are  
75 completely segregated in separate layers, but the small size of the LGN, with layers on the order  
76 of 1 mm thick, approaches the resolution limits of human neuroimaging. Previous MRI attempts  
77 have identified the regions at the group level and/or using a group-level criteria such as for the  
78 proportion of the M and P sections in LGN (Denison et al., 2014; P. Zhang et al., 2015), but this  
79 does not enable the measurement of the properties of the M and P layers in individuals. Further,  
80 previous studies, such as Denison et al. (2014), Qian et al. (2020), and Zhang et al. (2015)  
81 attempted to identify the M and P regions with fMRI using visual stimuli tuned to the M or P  
82 neurons. However, DeSimone and Schneider (2019) showed that the hilum region of the LGN, a  
83 vascular region rich with blood vessels and nerves, had larger responses across the range of  
84 stimuli. They found that any method based only on the response amplitudes without proper  
85 normalization would be likely to mistake the hilum for the M subdivision.

86 Our aim was to identify the M and P layers of the LGN in individual subjects using  
87 anatomical and functional procedures that did not rely upon their differences in functional  
88 response properties. Using fMRI, we attempted to segment the contralateral layers of LGN from  
89 the bordering ipsilateral layers (Figure 1a), i.e., isolating the ipsilateral cluster of Layers 2 and 3  
90 that separates the contralateral eye layer 1 (M) from Layers 4–6 (P). Previously, Haynes et al.  
91 (2005) used a 3T MRI scanner and monocular visual stimulation—participants closed one eye—  
92 to distinguish left from right eye signals. More recently, Qian et al. (2020) used a 7T scanner and  
93 presented monocular stimuli dichoptically using a fast refresh-rate projector alternating each eye  
94 between a visual stimulus while the image to the other eye was blank. They identified two  
95 clusters in the LGN, one lateral contralateral and another medial ipsilateral, but not individual

96 layers. Our goal was to compare the monocular and dichoptic viewing conditions in segregating  
97 the eye-specific regions in the LGN at 3T in individual subjects, and to determine the possibility  
98 of identifying the contralateral M layer.

99 We also sought to compare the fMRI results to structural methods. Recent developments  
100 in quantitative MRI (qMRI) permit measurement of the microstructure of tissues such as  
101 myelination (Lutti et al., 2014; Mezer et al., 2013), which can differentiate the M and P regions.  
102 The morphology of the M and P neurons in LGN differ, with P neurons having smaller somas  
103 and thinner axons and M neurons having larger somas and thicker axons. The density of the P  
104 neurons is therefore higher (Andrews & Purves, 1997; Hassler, 1966; Nassi & Callaway, 2009).  
105 It is unclear whether this higher density would result in greater overall myelination in the P  
106 region (Pistorio et al., 2006), or whether the thicker, more highly myelinated M axons would  
107 result in higher overall myelination in the M region (Yoonessi & Yoonessi, 2011). Müller-Axt et  
108 al. (2021) recently demonstrated qMRI results in the human LGN consistent with the former. At  
109 7T, they measured shorter T1 relaxation times in the P compared to M regions. Our overall aim  
110 was to replicate and compare these different techniques at 3T in individual subjects and to  
111 quantify the optimal duration of data acquisition necessary.

112

## 113 **2. Methods**

### 114 **2.1. Participants**

115 This study was approved by the University of Delaware Institutional Review Board. Three  
116 healthy participants (aged 28–33 years, 1 male) with normal or corrected-to-normal vision  
117 provided written informed consent and were compensated \$20/hour.

118

119 **2.2. MRI Procedures and Processing**

120 Each participant was scanned on seven different days (four structural scanning sessions and three  
121 functional) for approximately 90 min each day. MRI data were acquired on a 3T Siemens  
122 Magnetom Prisma MRI scanner with a 64-channel head coil. We used FSL software  
123 (<https://fsl.fmrib.ox.ac.uk/fsl/fslwiki/FSL>) to process all the MRI data unless otherwise noted.  
124 All the raw data is publicly available at <https://openneuro.org/datasets/ds004187>, the processed  
125 data and code are available at [https://github.com/yirem/LGN\\_layers](https://github.com/yirem/LGN_layers).

126

127 **2.2.1. T1-weighted MRI**

128 At the beginning of each scanning session, we acquired a 3D MPRAGE sequence (0.7 mm  
129 isotropic voxels, repetition time (TR) = 2080 ms, echo time (TE) = 4.64 ms, inversion time (TI)  
130 = 1050 ms, flip angle ( $\alpha$ ) = 9°, field of view (FoV) = 210 mm, phase-encoding acceleration  
131 factor = 2, scan time approximately 6 min). All subsequent scans were aligned to this T1-  
132 weighted image of each subject and analyzed in their native space.

133

134 **2.2.2. Quantitative MRI**

135 qMRI data were acquired with a 3D MP2RAGE sequence (0.7 mm isotropic voxels, TR = 5000  
136 ms, TE = 3.6 ms, partial phase Fourier in slice = 6/8, approximately 16 min acquisition time).  
137 The sequence had two inversion times and flip angles (TI<sub>1</sub> = 900 ms, TI<sub>2</sub> = 2750 ms,  $\alpha_1$  = 3°,  $\alpha_2$   
138 = 5°), enabling the calculation of the T1 relaxation time, i.e., the qT1 map. Seventeen scans were  
139 acquired for each participant during four sessions on different days, during which participants  
140 watched a movie of their choice.

141           The MP2RAGE sequence simultaneously acquired the T1-weighted ( $GRE_{T11}$ ) and proton  
142 density weighted ( $GRE_{T12}$ ) image volumes. The uniform T1-weighted image volume was  
143 obtained from the real component of the normalized complex ratio from the two acquired image  
144 volumes. This process amplifies the noise in the uniform T1-weighted image. Using the  
145 MP2RAGE toolbox (<https://github.com/benoitberanger/mp2rage>) in SPM  
146 (<https://www.fil.ion.ucl.ac.uk/spm/software/spm12/>) in MATLAB (The Math Works, Inc.), the  
147 numeric instability in background noise was suppressed by introducing a constant real number  
148 (beta) to the uniform T1-weighted image volume (O'Brien et al., 2014). We then computed qT1  
149 maps (also available at <https://openneuro.org/datasets/ds004187>), a measurement of the T1  
150 relaxation constant for each voxel. qT1 maps were computed for each of the 17 scans for each  
151 participant, 16 of which were aligned to the first one.

152           **2.2.2.1. Anatomical LGN Masks.** To create the LGN masks, we averaged the 16 qT1  
153 maps. The average qT1 map for each subject was then resampled to double the resolution (0.35  
154 mm isotropic voxels) with a sinc interpolation to reduce partial volume effects. Using this  
155 upsampled average qT1 map, we manually masked each LGN for each participant. A typical  
156 slice with the LGN outlined is shown for one subject in Figure 2. Care was taken to avoid  
157 incorporating the bright (high qT1) cerebrospinal fluid (CSF) into the LGN region of interest  
158 (ROI), which would confound the comparison of the M and P regions. This was aided by a  
159 darker region located between the CSF and LGN (see Figure 2). The qT1 map and LGN mask  
160 were then aligned to each subject's T1 volume, using 6 degrees of freedom and mutual info as  
161 the cost in FSL (Figure 4a).

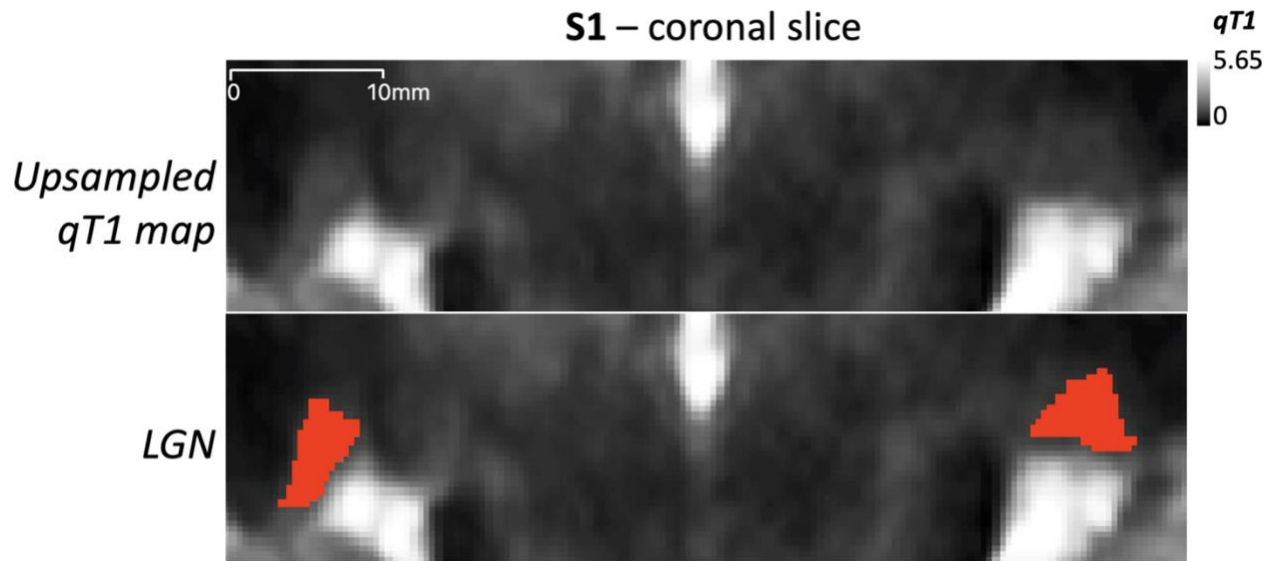

162

163 **Figure 2.** LGN mask on the coronal slice for a representative participant (S1). The upper panel is  
164 the upsampled average qT1 map (0.35 mm isotropic voxel resolution), with brighter colors  
165 indicating higher qT1 values. In the lower panel, the LGN are outlined in red.

166

167 **2.2.2.2. qT1 Analysis.** The left and right LGN were masked on the average qT1 map for  
168 each participant (Figure 4b) and analyzed separately. We expected two distributions of qT1  
169 values within the LGN voxels, corresponding to the M and P sections (Müller-Axt et al., 2021)  
170 and therefore fit each qT1 distribution to a mixture of two Gaussians using the fitgm function in  
171 MATLAB, as Müller-Axt et al. (2021) did with their 7T data. Figure 5a shows the histograms of  
172 qT1 maps with the fitted Gaussians. To ensure the two-component model was warranted, we  
173 compared the fit of the 2-component Gaussian model to a 1-component Gaussian model for each  
174 LGN using both Akaike Information Criteria (AIC) and Bayesian Information Criteria (BIC)  
175 using log-likelihoods with a maximum number of 1000 iterations. Every case favored the 2-  
176 component model (see Table S1 in Supplemental Materials). Diverging from the methods of  
177 Müller-Axt et al. (2021), we then calculated a qT1 threshold between the M and P distributions  
178 using the fraction of M voxels to the right of the threshold (dark blue line in Figure 5a):



$$f_M = \frac{p_M p_P}{p_M F_M + p_P F_P} \quad (1)$$

179 where  $p_M$  and  $p_P$  are the M and P proportions estimated by the Gaussian models, respectively  
180 (always arranged such that  $p_M < p_P$ ), and  $F_M$  and  $F_P$  are the cumulative distribution functions of  
181 the fitted Gaussian distribution for each component:

$$F(x) = P(G \leq x) \quad (2)$$

182 where  $x$  is the qT1 separation threshold ( $x$ -axis in Figure 5a) and  $P$  is the probability that the  
183 fitted Gaussian distribution  $G$  is less than or equal to  $x$ . We determined the threshold qT1 value  
184 (dashed line in Figure 5a) where at least 50% of the voxels to the right belonged to the M  
185 distribution. In post-mortem LGN (Müller-Axt et al., 2021), a more pronounced M distribution  
186 was evident, and thus, we decided on this liberal threshold because the M voxels were  
187 underestimated in the mixture Gaussian model with our 3T data.

188 **2.2.2.3. Random Subsampling Analysis.** To determine the number of qT1 maps that  
189 needed to be averaged to obtain reliable results, we reran the analysis for each of the 16  
190 individual qT1 maps and for the 16 random subsamples of different sizes, i.e., two to 15 qT1  
191 maps in a subsample, for each LGN and composed the average map and qT1 threshold as above,  
192 with the exception that the components were tagged as M and P based on the difference in their  
193 mean qT1 values rather than their estimated proportions. The reason for this change was to be  
194 able to use the proportion as a measure for the match with the analysis on the average of all 16  
195 maps which showed the mean qT1 values in accordance with the proportions of the M and P  
196 regions (higher qT1 and lower proportion vs lower qT1 higher proportion, respectively), but this  
197 may not be the case for different subsamples since the mixture Gaussian model may fail to fit to  
198 the noisier data. Crucially, we measured the classification accuracy by calculating the percent of

199 match in the categorization of voxels into M and P regions with the subsample vs the entire  
200 sample of the 16 maps averaged together.

201

### 202 **2.2.3. Functional MRI**

203 fMRI data were acquired over the whole brain with a multi-band EPI sequence with 84  
204 interleaved transversal slices at 1.5 mm isotropic voxel resolution (TR = 1500 ms, TE = 39 ms;  $\alpha$   
205 = 75°; FoV= 192 mm, bandwidth = 1562 Hz/Px, phase encoding = A → P), and a slice  
206 acceleration factor of 6.

207 **2.2.3.1. LGN Localizer.** For each of ten 5-min scans, participants were instructed to  
208 fixate on the dot at the screen center. As shown in Figure 3a, a 5 s fixation screen was followed  
209 by the 16 s visual stimulus that alternated between left and right hemifields with a 5 s blank  
210 between alternations. The initial hemifield was counterbalanced across blocks. Stimuli were  
211 presented on a 32-inch LCD BOLDscreen (Cambridge Research Systems Ltd.) with a 60 Hz  
212 refresh rate and 1920 × 1080 resolution. The stimuli were prepared and presented in MATLAB  
213 using Psychophysics Toolbox (Brainard, 1997; Kleiner et al., 2007; Pelli, 1997) on a Windows  
214 computer. The visual stimulus was a black and white checkerboard, hemifield radius of 8.5°,  
215 flicking at 4 Hz on a neutral gray background. The fixation point was drawn within a central gap  
216 of 0.25° in radius.

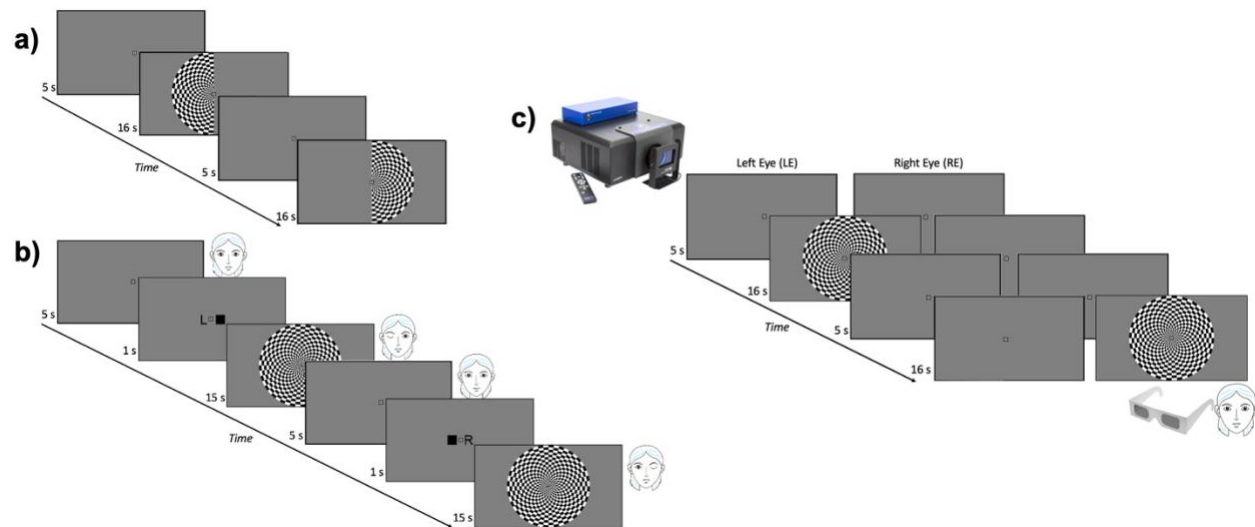

217

218 **Figure 3.** Timeline of fMRI tasks. **a)** LGN localizer with visual hemifield stimulation. **b)**  
219 Monocular eye localizer: each eye was stimulated alternately with the other eye closed. **c)**  
220 Dichoptic eye localizer: each eye was stimulated alternately with the other eye viewing a neutral  
221 gray blank screen.

222

223

**2.2.3.2. Monocular Eye Localizer.** For each of ten 5-min blocks (nine blocks for S2),

224 participants were instructed to fixate on the central dot on the screen, and close one eye at a time

225 when cued. A blank fixation screen was presented for 5 s followed by the instruction: the letter L

226 (respectively, R) on the left (right) side of the central dot and a black square on the right (left) to

227 indicate that the left (right) eye should be open and the right (left) eye closed (Figure 3b). After

228 1s, the full-field 4 Hz flickering checkerboard ( $17^\circ$  diameter,  $0.5^\circ$  central gap) appeared for 15 s

229 while the instruction remained in the central gap. The eye open conditions alternated regularly in

230 a 5-minute block, with the order counterbalanced across different blocks. The software and the

231 materials to prepare and present the stimuli was the same as those for the LGN localizer stimuli

232 (see 2.2.3.1).

233 **2.2.3.3. Dichoptic Eye Localizer.** Participants wore circularly polarized paper glasses,

234 and stimuli were presented with a ProPixx (VPixx, Inc.) projector with a 120 Hz refresh rate,

235  $1920 \times 1080$  resolution, and a circularly polarizing filter in front of the projector lens,

236 synchronized to the frame rate, which allowed for dichoptic viewing at 60 Hz. As Figure 3c  
237 illustrates, the timeline of this task was the same as that of the LGN localizer, but with a full-  
238 field visual stimulus shown either to the left eye or to the right eye while the other eye was  
239 shown the neutral gray fixation screen. The flickering checkerboard stimulus was the same as in  
240 the monocular eye localizer task, except  $12.5^\circ$  in diameter, due to the different screen size. The  
241 stimuli were prepared using the DataPixx toolbox and Psychophysics toolbox in MATLAB,  
242 running on a Linux computer.

243 **2.2.3.4. Data Processing.** To pre-process the functional data, we applied intensity  
244 normalization, high-pass temporal filtering and motion correction using MCFLIRT. For the  
245 binocular LGN localizer only, the data were spatially smoothed with a 2.5 mm FWHM kernel.

246 The data were analyzed with a generalized linear model (GLM) with two explanatory  
247 variables (EVs) for each experiment: left (LH) and right hemifield (RH) for the LGN localizer  
248 and left (LE) and right eye (RE) for the two eye localizer experiments. Also, a confound variable  
249 was added to the model for the motion outlier volumes, as determined by the `fsl_motion_outliers`  
250 command thresholded at the 75<sup>th</sup> percentile + 1.5 times the interquartile range. All possible  
251 contrasts were computed between the two main EVs. The significance threshold for the LGN  
252 localizer was corrected for multiple comparisons using cluster correction whereas no correction  
253 was applied for the eye localizer tasks, as they were analyzed in the LGN region of interest  
254 defined by the localizer scans. Finally, we conducted a fixed-effects analysis for each participant  
255 to combine the multiple scanning runs from each task separately and in combination across tasks.

256 Before analyzing the eye-specific signals, we first adjusted the LGN masks based on the  
257 LGN localizer results. For each subject, we examined the whole brain activity for LH vs RH and  
258 RH vs LH to identify the right and left LGN respectively. We outlined the significant activity in

259 the LGN using the LGN mask created from the anatomical qT1 map as an anchor to separate the  
260 activity from the adjacent pulvinar (Figure 4c). In some slices, the functional activity was not  
261 entirely aligned with the anatomical LGN mask (e.g., S3 in Figure 3c), perhaps due to  
262 uncorrected EPI distortions. In this case, the functional activity in that slice took precedence and  
263 the boundaries were determined utilizing other cues such as anatomical proportions of the LGN.

264 To identify the eye dominance signals in each LGN, we analyzed the functional data  
265 from the monocular and the dichoptic eye localizer tasks. For each voxel in the LGN, we  
266 determined its ocular preference based on the *t*-score for the LE vs. RE contrast (Haynes et al.,  
267 2005; Qian et al., 2020). A positive *t*-score in a voxel indicated a stronger LE response whereas a  
268 negative value indicated a stronger RE response.

269

### 270 **3. Results**

#### 271 **3.1. LGN Volume**

272 We calculated the LGN volume for each participant using the LGN masks created from the  
273 anatomical qT1 map (Figure 4b). The volume of the left LGN was 138.2, 132.4, and 131.0 mm<sup>3</sup>  
274 for each of three subjects and was smaller than their right LGN, measured as 147.2, 149.6, and  
275 132.4 mm<sup>3</sup> respectively. We also calculated the LGN volumes using the LGN masks that were  
276 adjusted for the significant visual activity (Figure 4c). These functionally adjusted LGN masks  
277 resulted in volumes of 125.9, 124.9, and 116.6 mm<sup>3</sup> for the left LGN and 154.0, 114.9, 130.3  
278 mm<sup>3</sup> for the right LGN, for each subject respectively. These volumes are smaller than the  
279 volumes that were calculated from the anatomically defined LGN, except for S1's right LGN.  
280 All volumes were within the range of 91–157 mm<sup>3</sup> reported in a histology study (Andrews et al.,  
281 1997).

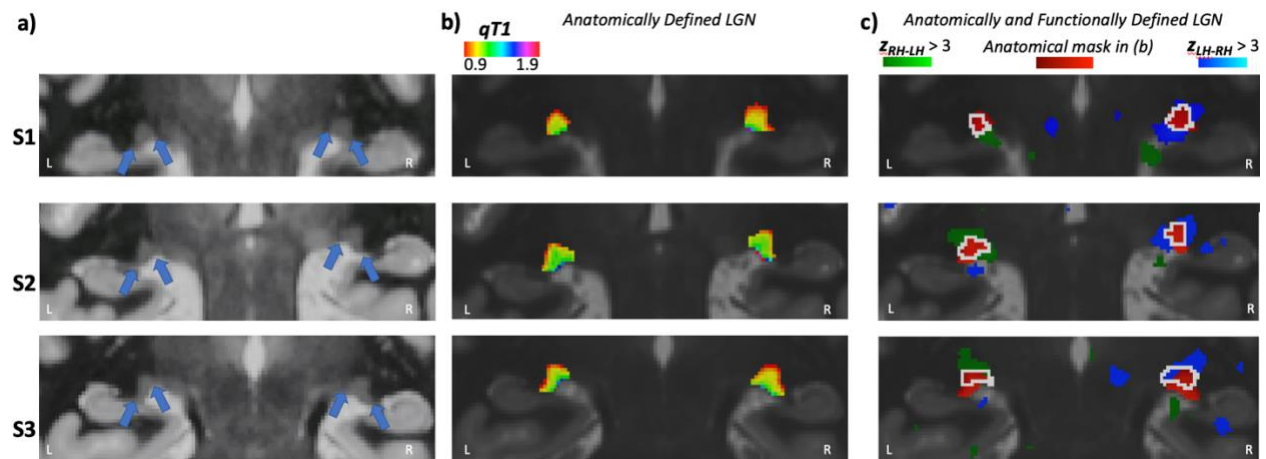

282

283 **Figure 4.** qT1 maps for each participant in separate rows. a) The average qT1 maps of a coronal  
284 slice for each subject. Contrast and brightness of the images were adjusted for this illustration. b)  
285 The color-coded qT1 maps within each LGN. c) LGN localizer results showing the significant  
286 functional activity for the contralateral visual hemifield compared to the ipsilateral hemifield  
287 (LH: left hemifield, RH: right hemifield), which is used to adjust the LGN masks for visual  
288 activity (white outline).

289

### 290 3.2. M and P Segmentation with qMRI

291 The qT1 results for the M and P subdivisions were anatomically reliable. First, as can be seen in  
292 the histograms in Figure 5a, the P voxels had shorter T1 relaxation than the M voxels, suggesting  
293 more myelination in the P region. The mean qT1 of the identified P voxels were  $1.03 \pm .003$ ,  
294  $1.08 \pm .003$ ,  $1.03 \pm .004$  s for left LGN and  $1.01 \pm .003$ ,  $1.08 \pm .003$ ,  $1.04 \pm .004$  s for right LGN  
295 while the mean qT1 of the M voxels were  $1.24 \pm .014$ ,  $1.33 \pm .018$ ,  $1.27 \pm .016$  s for left LGN  
296 and  $1.19 \pm .012$ ,  $1.35 \pm .023$ ,  $1.31 \pm .023$  s for right LGN, for each subject respectively. The  
297 mean difference in the mean qT1 values for M and P was  $235.49 \pm 14.9$  ms. This result is  
298 consistent with Müller-Axt et al.'s (2021) who also found shorter qT1 for the P segment and a  
299 difference in qT1 between the M and P around 300 ms using a 7T scanner. Also, as can be seen  
300 in Figure 4b and 5b, there was a gradual transition in qT1 from P to M region. P voxels that had  
301 a qT1 value closer to the threshold (dashed line in Figure 5a) were also spatially closer to the M  
302 set. This gradient nature of qT1 map within LGN was consistent across all slices for all subjects.

303 More importantly, the M and P subdivisions conformed to the expected anatomical locations. As  
304 evident in Figure 5b, the M voxels occupied the ventromedial region while the P voxels occupied  
305 the dorsolateral region of LGN for all subjects. Last, the identified M voxels made up 11.7%,  
306 15.8%, and 16% of the left LGN and 18.9%, 17%, and 16.6% of the right LGN for each subject  
307 respectively. These proportions are similar to what had been reported in histology studies  
308 (Andrews et al., 1997; Selemon & Begovic', 2007). All these results suggest that our M and P  
309 segmentation based on the qT1 values in LGN is anatomically consistent in their proportion,  
310 myelination, and spatial location within LGN.

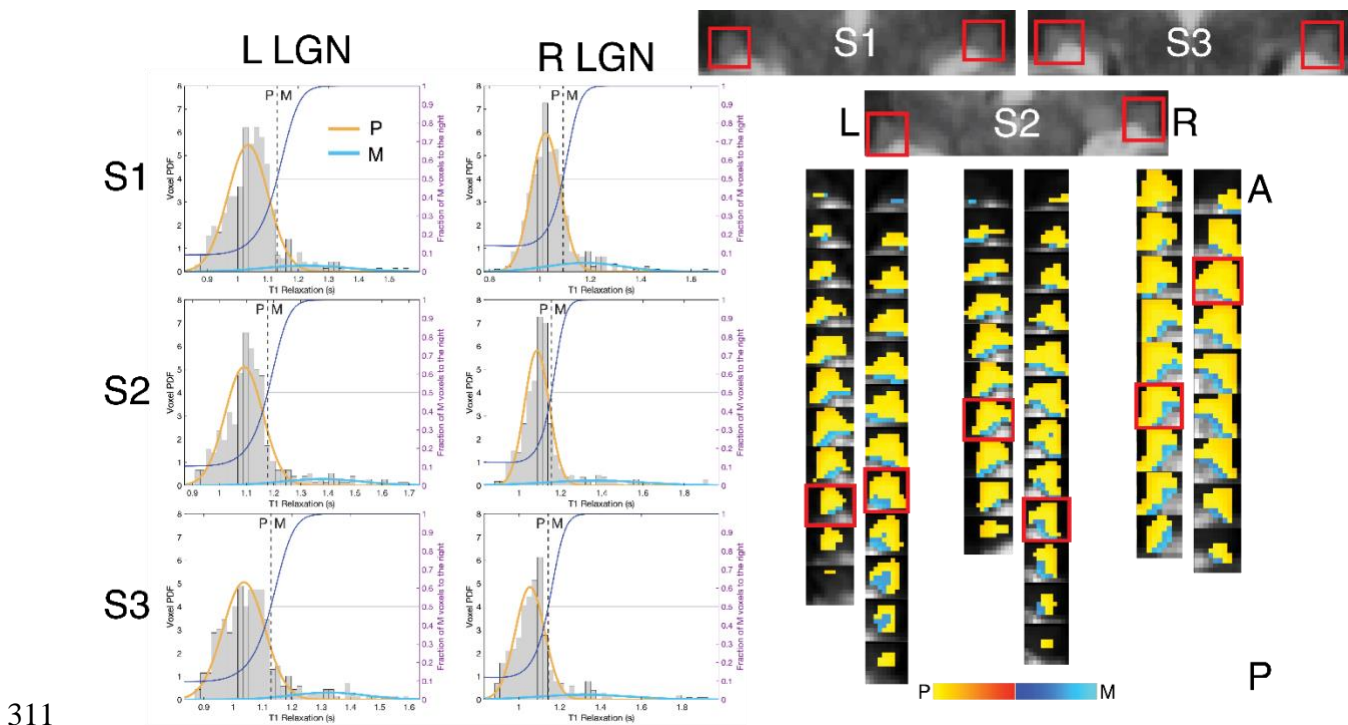

311

312 **Figure 5.** qT1 results for each participant. a) Histograms of voxels for each LGN. The x-axis is  
313 the qT1 values, the left y-axis is the voxel probability density function, and the right y-axis is the  
314 fraction of M voxels to the right of the distribution for a given cut-off value which is plotted with  
315 the dark blue line. Yellow and blue lines show the Gaussian fits for M and P resulting from a  
316 two-component mixture model of the data while the dashed line shows the actual cut-off for M  
317 and P where the fraction of voxels belonging to the right of the distribution is 50%. b) qT1 maps  
318 color-coded within the M and P, separated based on the cut-off indicated by the dashed line in a.  
319 The red outlined are the slices corresponding to the reference coronal slice for each LGN.  
320

321           We acquired more qT1 data (16 volumes per subject) than were necessary, to determine  
322 how much data was required at 3T to obtain reliable results. We randomly subsampled the set of  
323 qT1 maps and repeated the M and P segmentation process for different numbers of volumes used  
324 for each average map as well as for each volume separately. In general, only a small number of  
325 averages were required to reliably produce the same result as averaging 16 volumes. Figure 6  
326 illustrates the match between the subsample and the entire sample, in terms of the percent of  
327 voxels classified as the same (M or P) with the qT1 analysis. The blue dots represent each  
328 subsample and there were 16 dots for each subsample size on the  $x$ -axis, except the entire sample  
329 of 16 maps. The Gaussian mixture model generally failed to fit the data for the individual maps  
330 ( $N = 1$ ), resulting in a very low classification accuracy. The black bars show the mean match for  
331 each subsample size on the  $x$ -axis. Fitting an exponential shows convergence to an asymptote  
332 (dashed line) at 95.53% consistent categorization on average. The number of volumes to reach  
333 95% of this asymptote (lower edge of the shaded area around the dashed line) ranged from 2–5,  
334 corresponding to 1–1.5 hours of scanning. We also calculated the proportion of M in the entire  
335 LGN as a function of the number of averaged maps in each subsample (see Figure S1 in the  
336 supplemental). This measure also agreed with the conclusion that 1–1.5 hours of data were  
337 sufficient for reliable segregation of the M and P regions in the LGN.



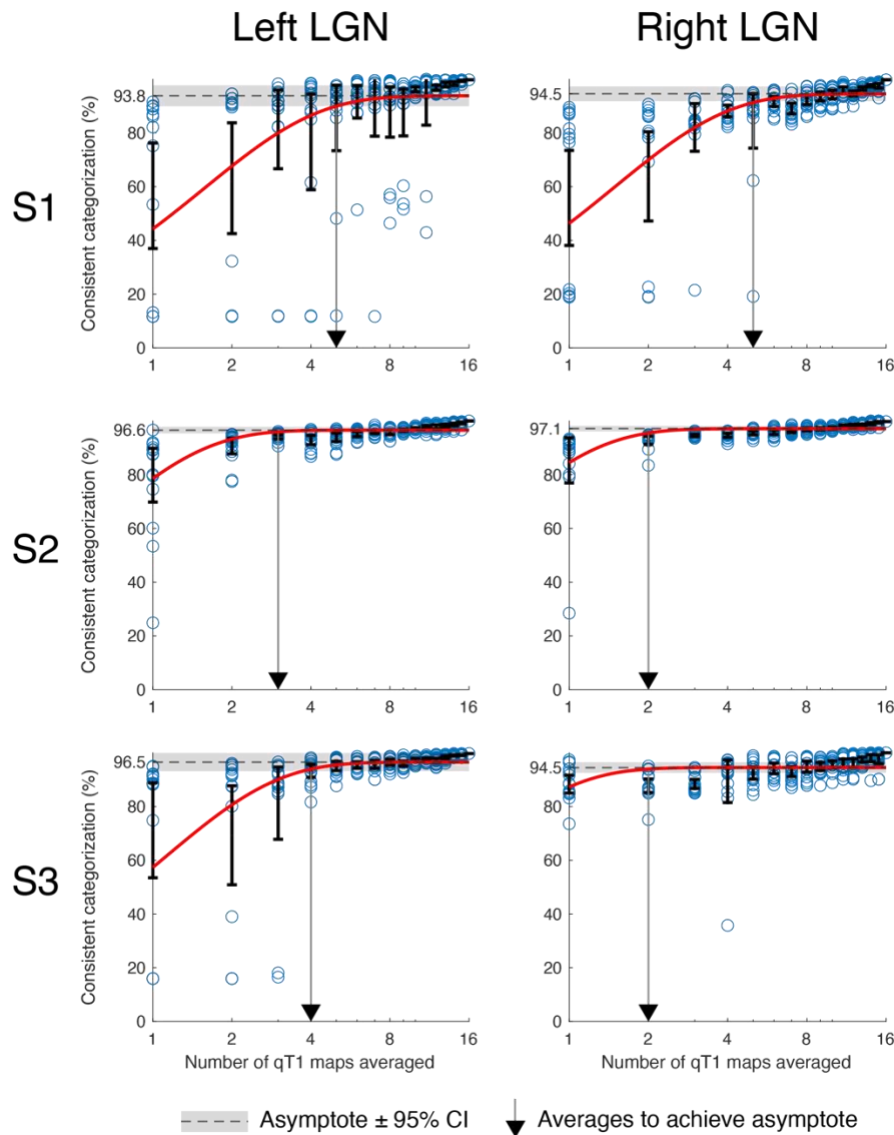

338

339 **Figure 6.** Results for the random subsampling of qT1 maps for each LGN. On the y-axis is the  
 340 percent of voxels classified as the same with the subsample vs the entire sample. On the x-axis is  
 341 the number of qT1 maps used in the subsample. Each blue dot represents a subsample while the  
 342 dot on  $x=16$  represents the entire sample. The black bars are centered around the means of 16  
 343 subsamples of different sizes (i.e., 16 blue dots for  $x=1$  through  $x=15$ ); error bars indicating 95%  
 344 confidence intervals (CIs). The red curve is the exponential growth curve fitted on the log of the  
 345 means, using the formula  $a \left( 1 - e^{-\frac{x}{b}} \right)$ , where  $x$  is the subsample size on the x-axis;  $a$  and  $b$  are  
 346 the estimated parameters where  $a$  is the percent at which the curve reaches to a horizontal  
 347 asymptote which is indicated by a dashed line with the shades indicating the 95% CIs. The  
 348 vertical grey line is where the fitted curve reaches the lower bound of the asymptote.  
 349

### 350 3.3. Eye-specific Segmentation with fMRI

351 The results of the monocular and dichoptic tasks, as well as a statistical combination of the two  
352 tasks, are shown in Figure 7 for a representative subject. However, the results were similar for  
353 the other subjects (see Figure S1 in the Supplemental Materials). Figure 7 color codes the voxels  
354 as responding to the contralateral (blue) and ipsilateral (red) stimuli for each LGN when  
355 calculated based on the sign of the  $t$ -score for LE vs RE contrast. The monocular task resulted in  
356 a stronger ocular preference compared to the dichoptic task. This result can be seen in Figure 7 in  
357 the combined results for the two tasks (third row) which appeared more similar to the monocular  
358 condition. Accordingly, the dichoptic task significantly activated fewer voxels (Figure 7 bottom).  
359 Thus, the eye signals were stronger in LGN when the other eye was closed instead of being open  
360 and presented with a blank screen. The contribution from the non-stimulated eye on the signals  
361 for the stimulated eye differed between tasks.

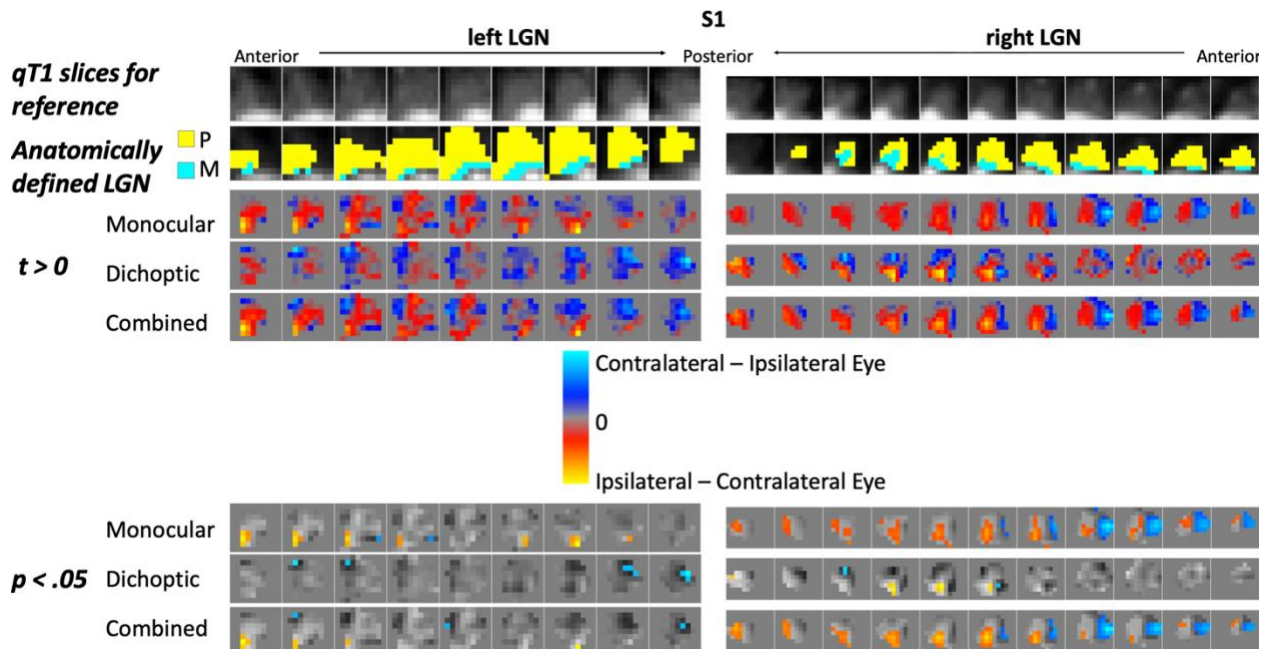

362  
363 **Figure 7.** Eye-specific activity for a representative participant (S1). For reference, the average  
364 qT1 map and the anatomically defined LGN (Figure 4b) with the M and P segregation based on  
365 the qT1 analysis was shown on the first two rows for the same slices as in the images below  
366 them. The LGN masks for the eye-specific fMRI results were anatomically and functionally  
367 identified as illustrated in Figure 4c. For the monocular eye localizer, participants closed one eye  
368 at a time. For the dichoptic eye localizer, one eye was shown blank while the other eye was

369 visually stimulated. The ocular preference was calculated based on the  $t$  values for Left Eye >  
370 Right Eye in the eye localizer analysis, changed here to show the contralateral and ipsilateral eye  
371 for illustration. On the bottom are the voxels showing significant ocular preference for Left Eye  
372 > Right Eye contrast.  
373

374           There was a RE dominance evident in both tasks. As seen in Figure 7, there were more  
375 ipsilateral voxels in the right LGN (red) while more contralateral voxels were identified for the  
376 left LGN (blue). The exceptions to this RE bias were observed in the monocular task in S1's left  
377 LGN, which had more voxels preferring the LE, and in S3's left LGN, which had equal number  
378 of RE and LE voxels (also see Table 1). On average, the percentage of RE voxels to the LGN  
379 was 56.5% for the left LGN and 65% for the right LGN with the dichoptic task whereas it was  
380 44.5% for the left LGN and 64.3% for the right LGN with the monocular task.

381           Figure 8 displays the correlations for each voxel between the ocular preferences with  
382 different tasks, i.e.,  $t$ -score for LE vs RE. The correlation between the tasks was significant for  
383 five out of six LGN,  $p$ 's  $\leq .001$ . The LGN that did not show significant correlation (S2 right  
384 LGN) also failed to show voxels that were significant in their ocular preference in the combined  
385 analysis of the two tasks, as indicated by the red dots in Figure 8. All the significant correlations  
386 increased when we used only the significant voxels from the combined analysis (the third row in  
387 Figure 7 and Figure S1).

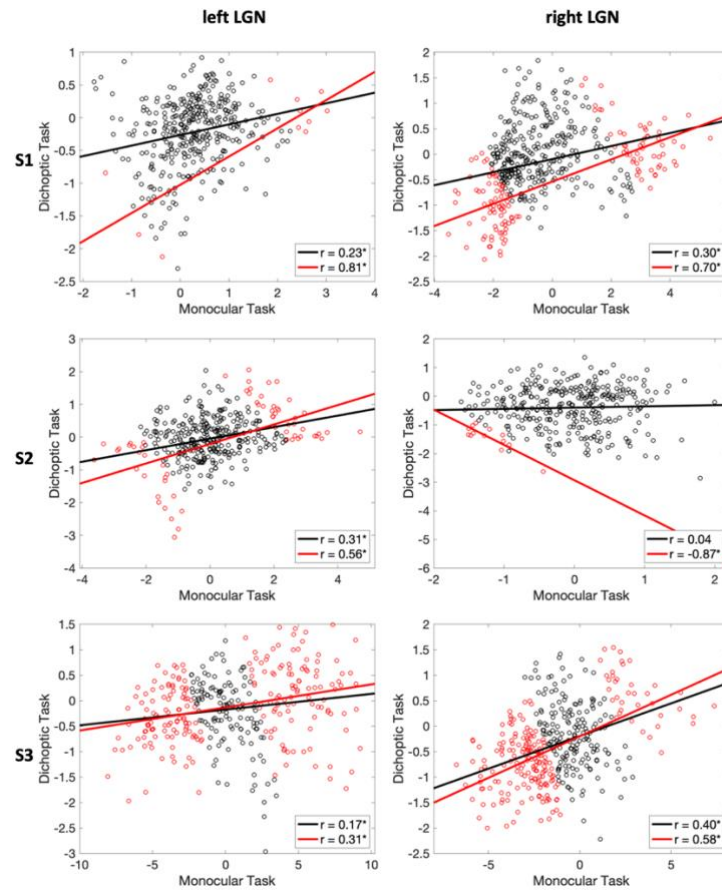

388

389 **Figure 8.** Scatterplots of voxels showing the ocular preference with the monocular and dichoptic  
390 tasks for each participant. The red dots are the voxels whose ocular preference was significant in  
391 the combined analysis of the two tasks. The solid lines show the correlation between the two  
392 tasks (black for all voxels and red for only the significant voxels. \* $p \leq .002$   
393

394 To test the significance of the LE vs. RE classification based only on the sign of their  $t$ -  
395 scores and ignoring the magnitude, we conducted a chi-square analysis for each LGN on the  
396 resulting categorical variables (Table 1). The classification of the voxels matched between the  
397 two eye localizer tasks on only four of the six LGN,  $p$ 's < .001. These significant results were  
398 driven by the RE bias in the classification. A close inspection of the cross-tables in Table 1  
399 indicated that there was more match between the RE voxels (the upper left cell for each subject's  
400 each LGN) than between the LE voxels (the lower right cell) for the majority of the LGN. Table  
401 2 shows the chi-square results for the voxels showing significant ocular preference in the

SUBDIVISIONS OF LGN

402 combined analysis of the two tasks. The right eye bias was reduced when only the significant  
 403 voxels were classified and the classification with the two tasks significantly matched again for  
 404 four out of six LGN,  $p$ 's < .001.

|           |                       | <i>Number of voxels</i> |             |           |           | $\chi^2$ |           | <i>p</i> |           |
|-----------|-----------------------|-------------------------|-------------|-----------|-----------|----------|-----------|----------|-----------|
|           |                       | left LGN                | right LGN   | left LGN  | right LGN | left LGN | right LGN | left LGN | right LGN |
|           |                       | <i>Dichoptic Task</i>   |             |           |           |          |           |          |           |
|           |                       | <i>RE</i>               | <i>LE</i>   | <i>RE</i> | <i>LE</i> |          |           |          |           |
| <b>S1</b> |                       | <i>RE</i>               | 87 31       | 205 93    | 11.3      | 27.7     | < .001    | < .001   |           |
|           |                       | <i>LE</i>               | 138 11<br>1 | 65 86     |           |          |           |          |           |
| <b>S2</b> | <i>Monocular Task</i> | <i>RE</i>               | 115 72      | 123 56    | 14.1      | 2.24     | < .001    | .13      |           |
|           |                       | <i>LE</i>               | 74 10<br>3  | 95 61     |           |          |           |          |           |
| <b>S3</b> |                       | <i>RE</i>               | 100 70      | 218 60    | .97       | 37       | .33       | < .001   |           |
|           |                       | <i>LE</i>               | 91 79       | 47 55     |           |          |           |          |           |

405  
 406 **Table 1.** Chi-square results for Left Eye (LE) and Right Eye (RE) categorization in each LGN  
 407

|                       |                       | <i>Number of voxels</i> |           |           |                | $\chi^2$ |           | <i>p</i> |           |        |
|-----------------------|-----------------------|-------------------------|-----------|-----------|----------------|----------|-----------|----------|-----------|--------|
|                       |                       | left LGN                |           | right LGN |                | left LGN | right LGN | left LGN | right LGN |        |
| <i>Dichoptic Task</i> |                       |                         |           |           |                |          |           |          |           |        |
|                       |                       | <i>RE</i>               | <i>LE</i> | <i>RE</i> | <i>L<br/>E</i> |          |           |          |           |        |
| <b>S1</b>             |                       | <i>RE</i>               | 3         | 0         | 78             | 1        | 3.44      | 61.52    | .064      | < .001 |
|                       |                       | <i>LE</i>               | 3         | 5         | 22             | 35       |           |          |           |        |
| <b>S2</b>             | <i>Monocular Task</i> | <i>RE</i>               | 25        | 0         | 13             | -        | 48.59     | -        | < .001    | -      |
|                       |                       | <i>LE</i>               | 4         | 34        | -              | -        |           |          |           |        |
| <b>S3</b>             |                       | <i>RE</i>               | 73        | 32        | 152            | 12       | 18.95     | 118.41   | < .001    | < .001 |
|                       |                       | <i>LE</i>               | 91        | 79        | 47             | 55       |           |          |           |        |

408

409 **Table 2.** Chi-square results for Left Eye (LE) and Right Eye (RE) categorization in each LGN  
 410 for only the voxels that showed significant ocular preference in the combined analysis.

411

412 Our goal in identifying the eye-specific regions was to segment the M and P layers. First,  
 413 we could not quantitatively compare the results from the qMRI processing with the fMRI  
 414 processing because of the mismatch between the LGN masks when adjusted for functional  
 415 activation (see Section 2.2.3.4). More importantly, we tried to identify the contralateral layers  
 416 positioned most ventrally or dorsally to find the contralateral M or P layers, respectively. The  
 417 dorsal contralateral region appeared robustly with either eye localizer task for all LGN using the  
 418 signed classification, and in four of six LGN using only the voxels activated significantly by the  
 419 combination of both tasks (see Figure S1). However, the ventral contralateral layer did not  
 420 appear reliably. We could identify the ventral contralateral layer in only two LGN in one or other  
 421 of the tasks, though the successful task differed between the two LGN (monocular task for S1  
 422 left LGN and dichoptic task for S3 left LGN; see Figure S1). Using only the significant voxels in  
 423 the combined analysis (Figure S1, third row for each subject), the ventral contralateral layer  
 424 could only be identified for S3. Instead of reliable individual layers, we could identify a

425 contralateral eye cluster located more dorsolateral and an ipsilateral eye cluster located more  
426 medioventral.

427

#### 428 **4. Discussion**

429 To segregate the M and P regions in human LGN, we used MRI methods that were not  
430 dependent on the stimulus characteristics, unlike the previous attempts (Denison et al., 2014; P.  
431 Zhang et al., 2015) that were confounded by the stronger activation of hilum of LGN (DeSimone  
432 & Schneider, 2019). Using qT1 (i.e., measuring the T1 relaxation time for each voxel), we  
433 successfully identified the M and P components of both LGN in all the subjects, which  
434 conformed to our anatomical expectations. However, attempting to identify the individual ipsi-  
435 or contralateral layers using fMRI was less successful. The identification of the eye-specific  
436 regions was more consistent with the monocular task than the dichoptic task. The P layers in the  
437 dorsal contralateral cluster could be readily identified, but the ventral contralateral (M) layer was  
438 not consistently activated.

439 qMRI, with a MP2RAGE sequence we used, has been shown to be more advantageous  
440 for precisely imaging subcortical structures. Aldusary et al. (2019) compared different T1  
441 sequences for LGN volume and found that MPRAGE imaging was more accurate compared to  
442 proton density imaging with a 3T scanner. Using the MP2RAGE sequence with two inversion  
443 times allowed us to calculate the T1 parameter for each voxel, which enhanced the segmentation  
444 of the whole LGN relative to an MPRAGE or proton-density weighted sequence and allowed the  
445 segmentation of the M and P divisions. The whole LGN volumes we found were consistent with  
446 post-mortem histology (Andrews et al., 1997) and with the structural MRI studies with a 3T  
447 scanner (proton density imaging in Giraldo-Chica et al., 2015; phase difference enhanced

448 imaging in Kitajima et al., 2015; T1-weighted imaging in Wang et al., 2015). On the other hand,  
449 when defined functionally, previous studies reported much higher volumes of LGN (Denison et  
450 al., 2014; Kastner et al., 2004), likely as a result from the difficulty of segmenting the LGN from  
451 surrounding visually active regions such as the lateral and medial pulvinar.

452 To segregate the M and P regions based on the qT1 maps, we followed a data-driven  
453 approach to replicate Müller-Axt et al. (2021) at 3T. By fitting a two-component model to the  
454 qT1 data, we selected the smaller proportion component as M and the larger proportion  
455 component as P. The P component showed shorter T1 relaxation time (i.e., qT1) than the M  
456 component, indicating more myelination in the P region. This is consistent with Müller-Axt et  
457 al.'s (2021) results (also see preprint Oishi et al., 2020) and with higher cell density and more  
458 myelination in the P compared to the M divisions (Hassler, 1966; Pistorio et al., 2006). Previous  
459 studies used a fixed proportion as the criterion to segregate the M and P sections (Denison et al.,  
460 2014; Oishi et al., 2020), based on the histology findings that, on average, 20% of the LGN is M  
461 (Andrews et al., 1997; Selemon & Begovic', 2007), but this approach, even if correct, would not  
462 allow the independent measurement of the M division properties. Individuals show great  
463 variation in the proportions of the subdivisions (Andrews et al., 1997; Müller-Axt et al., 2021),  
464 and indeed our participants had M divisions ranging from 12–19% of the LGN volume. We were  
465 able to identify the M and P subdivisions in individual subjects, compared to in a group as was  
466 shown in Müller-Axt et al. (2021). We acquired a large amount of data in a small number of  
467 subjects to perform a subsampling analysis to demonstrate that 1–1.5 hours of scanning at 3T  
468 was sufficient to reliably classify the M and P voxels in individual LGN.

469 In the thalamus and brainstem, pulsatile motions are a concern that can cause noise in the  
470 images. We were nonetheless able to obtain reliable results with the qT1 scans after averaging as



471 few as 2–5 volumes. Also, obtaining reliable qT1 measurements in the M region requires that the  
472 bright cerebrospinal fluid (CSF) be excluded from the LGN masks (McNab et al., 2013).  
473 Upsampling the qT1 image helped reduce partial volume effects and exclude the CSF from the  
474 LGN masks. Also, the thickness of the M region (Figure 5b) relative to the voxel size (0.7 mm  
475 isotropic) was sufficient to reliably distinguish the CSF from M, enabling us to exclude the CSF  
476 as a significant contaminating factor to the qT1 estimates for the M region. Similarly, the hilum  
477 could potentially be mistaken for the M section, as blood vessels show T1 values similar to M  
478 region (X. Zhang et al., 2013). However, Figure 5b indicates that the geometry of the M region  
479 was not consistent with a hilum confound, i.e., the identified M region did not generally intrude  
480 dorsolaterally into the interior of the LGN as would the hilum, except perhaps in two posterior  
481 slices in one subject. Given that this intrusion was rare, and combined with the lack of any  
482 observed hilar structure in Müller-Axt et al.’s (2021), we conclude that the interior intrusion of  
483 the M subdivision in these two slices was mostly likely a result of the folding structure of the  
484 LGN and not the hilum.

485         Our investigation of the eye dominance signals did not yield consistent results with the  
486 monocular vs. dichoptic eye localizer tasks when analyzed with a generalized linear model  
487 (GLM). We found that the eye-specific signal amplitudes were larger with the monocular than  
488 dichoptic task such that it was difficult even to measure significant activation with the dichoptic  
489 task despite the same amount of data. This might indicate interference or rivalry from the “non-  
490 stimulated” eye during dichoptic presentation. Both tasks revealed right eye dominance in all  
491 three subjects, comprising 57.6% of the LGN volume on average. The classification of the RE  
492 voxels was more consistent between the tasks than for the LE voxels. Previous studies  
493 identifying voxel eye preference used these two tasks separately (Haynes et al., 2005; Qian et al.,

494 2020). Using the dichoptic task, Qian et al. (2020) identified significant eye-specific clusters  
495 with GLM at 7T. Here, we show that the GLM was not suitable to detect significant eye-specific  
496 activations at 3T with dichoptic presentation. This poses a problem because dichoptic  
497 presentation can be coded by the experimenter to control which eye to be stimulated while the  
498 monocular task requires subjects to close each eye alternately that cannot be controlled by the  
499 experimenter unless an eye tracking device is used.

500 In our investigation of the M and P eye signals, we could not compare the results from  
501 fMRI with qMRI as there was not an exact match between the voxels of the LGN masks used for  
502 the two. Adjustment of the anatomical LGN masks for the visual activity was not expected to  
503 make such a difference; however, this is well beyond our study and perhaps related to the EPI  
504 distortions. Crucially for the eye-specific signal investigation though, we found that the dorsal  
505 contralateral-eye region, classified as P, could be reliably identified with both monocular and  
506 dichoptic tasks, whereas the ventral contralateral-eye layer, which would be classified as M,  
507 could not be reliably activated with either task. The fMRI resolution we used (1.5 mm isotropic)  
508 is not optimal for imaging the contralateral M layer, and it is difficult to improve this resolution  
509 without the signal being lost in the noise at 3T. Other techniques for thin layer segmentation  
510 could be used such as anisotropic voxels with slices parallel to the LGN (e.g., Kashyap et al.,  
511 2018), although this requires subjects with a particular LGN geometry and perhaps  
512 unconventional positioning in the scanner and enhanced motion suppression. Critically for our  
513 fMRI methods, the hilum region of LGN did not dominate the responses to eye-specific stimuli  
514 when the other eye was closed. However, the right eye bias did interfere with our ability to  
515 classify the eye-specific layers, and functionally identifying the eye-specific layers does not  
516 appear to be a promising approach to segmenting the M and P regions of the LGN.

517            In summary, our qT1 results using a 3T MRI scanner replicated measurements performed  
518            at 7T (Müller-Axt et al., 2021). Our results at the individual subjects indicate that this qMRI  
519            method and analysis can be used for M and P segmentation with only 1.5 hours of data, a  
520            reasonable application time for clinical and research purposes. Our fMRI results for eye-specific  
521            region segmentation using GLM were much more reliable when subjects closed an eye  
522            (monocular stimulation) than when stimulating only one eye with both eyes open (dichoptic).

523

### **Acknowledgments**

524 This work was supported by the National Institutes of Health (NIH/NEI 1R01EY028266 to

525 KAS).

526 We would like to thank Ibrahim Malik, Joy Lin, Christina Nelson, Jack Melchiorre, Anton

527 Lebed, and Heather Aiken for their assistance during data collection.

528 **References**

- 529 Aldusary, N., Michels, L., Traber, G. L., Hartog-Keisker, B., Wyss, M., Baeshen, A., Huebel, K.,  
530 Almalki, Y. E., Brunner, D. O., Pruessmann, K. P., Landau, K., Kollias, S., & Piccirelli, M.  
531 (2019). Lateral geniculate nucleus volumetry at 3T and 7T: Four different optimized  
532 magnetic-resonance-imaging sequences evaluated against a 7T reference acquisition.  
533 *NeuroImage*, *186*, 399–409. <https://doi.org/10.1016/J.NEUROIMAGE.2018.09.046>
- 534 Aleci, C., & Belcastro, E. (2016). Parallel convergences: A glimpse to the magno-And  
535 parvocellular pathways in visual perception. *World Journal of Research and Review*, *3*(3),  
536 34–42.
- 537 Andrews, T. J., Halpern, S. D., & Purves, D. (1997). Correlated Size Variations in Human Visual  
538 Cortex, Lateral Geniculate Nucleus, and Optic Tract. *Journal of Neuroscience*, *17*(8), 2859–  
539 2868. <https://doi.org/10.1523/JNEUROSCI.17-08-02859.1997>
- 540 Andrews, T. J., & Purves, D. (1997). Similarities in normal and binocularly rivalrous viewing.  
541 *Proceedings of the National Academy of Sciences of the United States of America*, *94*(18),  
542 9905–9908. <https://doi.org/10.1073/PNAS.94.18.9905>
- 543 Brainard, D. H. (1997). The psychophysics toolbox. *Spatial Vision*, *10*(4), 433–436.  
544 <https://doi.org/10.1163/156856897X00357>
- 545 Breitmeyer, B. G. (2014). Contributions of magno- and parvocellular channels to conscious and  
546 non-conscious vision. *Philosophical Transactions of the Royal Society B: Biological*  
547 *Sciences*, *369*(1641), 20130213–20130213. <https://doi.org/10.1098/rstb.2013.0213>
- 548 Butler, P. D., & Javitt, D. C. (2005). Early-stage visual processing deficits in schizophrenia.  
549 *Current Opinion in Psychiatry*, *18*(2), 151–157. [https://doi.org/10.1097/00001504-](https://doi.org/10.1097/00001504-200503000-00008)  
550 [200503000-00008](https://doi.org/10.1097/00001504-200503000-00008)

- 551 Denison, R. N., & Silver, M. A. (2012). Distinct contributions of the magnocellular and  
552 parvocellular visual streams to perceptual selection. *Journal of Cognitive Neuroscience*,  
553 24(1), 246–259. [https://doi.org/10.1162/jocn\\_a\\_00121](https://doi.org/10.1162/jocn_a_00121)
- 554 Denison, R. N., Vu, A. T., Yacoub, E., Feinberg, D. A., & Silver, M. A. (2014). Functional  
555 mapping of the magnocellular and parvocellular subdivisions of human LGN. *NeuroImage*,  
556 102(P2), 358–369. <https://doi.org/10.1016/j.neuroimage.2014.07.019>
- 557 Derrington, A. M., & Lennie, P. (1984). Spatial and temporal contrast sensitivities of neurones in  
558 lateral geniculate nucleus of macaque. *The Journal of Physiology*, 357(1), 219–240.  
559 <https://doi.org/10.1113/JPHYSIOL.1984.SP015498>
- 560 DeSimone, K., & Schneider, K. A. (2019). Distinguishing hemodynamics from function in the  
561 human LGN using a temporal response model. *Vision*, 3(2), 27.  
562 <https://doi.org/10.3390/VISION3020027>
- 563 Giraldo-Chica, M., Hegarty, J. P., & Schneider, K. A. (2015). Morphological differences in the  
564 lateral geniculate nucleus associated with dyslexia. *NeuroImage: Clinical*, 7, 830–836.  
565 <https://doi.org/10.1016/J.NICL.2015.03.011>
- 566 Hassler, R. (1966). Comparative anatomy of the central visual systems in day-and night-active  
567 primates. In *Evolution of the Forebrain* (pp. 419–434). Springer, Boston, MA.  
568 [https://doi.org/10.1007/978-1-4899-6527-1\\_40](https://doi.org/10.1007/978-1-4899-6527-1_40)
- 569 Haynes, J. D., Deichmann, R., & Rees, G. (2005). Eye-specific effects of binocular rivalry in the  
570 human lateral geniculate nucleus. *Nature*, 438(7067), 496–499.  
571 <https://doi.org/10.1038/nature04169>

- 572 Kashyap, S., Ivanov, D., Havlicek, M., Sengupta, S., Poser, B. A., & Uludağ, K. (2018).  
573 Resolving laminar activation in human V1 using ultra-high spatial resolution fMRI at 7T.  
574 *Scientific Reports*, 8(1), 17063. <https://doi.org/10.1038/s41598-018-35333-3>
- 575 Kastner, S., O'Connor, D. H., Fukui, M. M., Fehd, H. M., Herwig, U., & Pinsk, M. A. (2004).  
576 Functional imaging of the human lateral geniculate nucleus and pulvinar. *Journal of*  
577 *Neurophysiology*, 91(1), 438–448.  
578 <https://doi.org/10.1152/JN.00553.2003/ASSET/IMAGES/LARGE/9K0143604108.JPEG>
- 579 Kitajima, M., Hirai, T., Yoneda, T., Iryo, Y., Azuma, M., Tateishi, M., Morita, K., Komi, M., &  
580 Yamashita, Y. (2015). Visualization of the medial and lateral geniculate nucleus on phase  
581 difference enhanced imaging. *American Journal of Neuroradiology*, 36(9), 1669–1674.  
582 <https://doi.org/10.3174/AJNR.A4356>
- 583 Kleiner, M., Brainard, D., Pelli, D., Ingling, A., Murray, R., & Broussard, C. (2007). What's new  
584 in psychtoolbox-3? *Perception*, 36(14), 1–16.  
585 <https://nyuscholars.nyu.edu/en/publications/whats-new-in-psychtoolbox-3>
- 586 Livingstone, M., & Hubel, D. (1988). Segregation of Form, Color, Movement, and Depth:  
587 Anatomy, Physiology, and Perception. *Science*, 240(4853), 740–749.  
588 <https://doi.org/10.1126/SCIENCE.3283936>
- 589 Lutti, A., Dick, F., Sereno, M. I., & Weiskopf, N. (2014). Using high-resolution quantitative  
590 mapping of R1 as an index of cortical myelination. *NeuroImage*, 93 Pt 2, 176–188.  
591 <https://doi.org/10.1016/J.NEUROIMAGE.2013.06.005>
- 592 Maunsell, J. H. R. (1992). Functional visual streams. *Current Opinion in Neurobiology*, 2(4),  
593 506–510. [https://doi.org/10.1016/0959-4388\(92\)90188-Q](https://doi.org/10.1016/0959-4388(92)90188-Q)

- 594 McNab, J. A., Polimeni, J. R., Wang, R., Augustinack, J. C., Fujimoto, K., Stevens, A., Janssens,  
595 T., Farivar, R., Folkerth, R. D., Vanduffel, W., & Wald, L. L. (2013). Surface based  
596 analysis of diffusion orientation for identifying architectonic domains in the in vivo human  
597 cortex. *NeuroImage*, *69*, 87–100. <https://doi.org/10.1016/J.NEUROIMAGE.2012.11.065>
- 598 Merigan, W. H., & Maunsell, J. H. R. (1993). How parallel are the primate visual pathways?  
599 *Annual Review of Neuroscience*, *16*, 369–402.  
600 <https://doi.org/10.1146/ANNUREV.NE.16.030193.002101>
- 601 Mezer, A., Yeatman, J. D., Stikov, N., Kay, K. N., Cho, N. J., Dougherty, R. F., Perry, M. L.,  
602 Parvizi, J., Hua, L. H., Butts-Pauly, K., & Wandell, B. A. (2013). Quantifying the local  
603 tissue volume and composition in individual brains with magnetic resonance imaging.  
604 *Nature Medicine*, *19*(12), 1667–1672. <https://doi.org/10.1038/NM.3390>
- 605 Milner, A. D. (2012). Is visual processing in the dorsal stream accessible to consciousness?  
606 *Proceedings of the Royal Society B: Biological Sciences*, *279*(1737), 2289–2298.  
607 <https://doi.org/10.1098/RSPB.2011.2663>
- 608 Müller-Axt, C., Eichner, C., Rusch, H., Kauffmann, L., Bazin, P. L., Anwander, A., Morawski,  
609 M., & von Kriegstein, K. (2021). Mapping the human lateral geniculate nucleus and its  
610 cytoarchitectonic subdivisions using quantitative MRI. *NeuroImage*, *244*, 118559.  
611 <https://doi.org/10.1016/J.NEUROIMAGE.2021.118559>
- 612 Nassi, J. J., & Callaway, E. M. (2009). Parallel processing strategies of the primate visual  
613 system. *Nature Reviews Neuroscience* *2009 10:5*, *10*(5), 360–372.  
614 <https://doi.org/10.1038/nrn2619>
- 615 O'Brien, K. R., Kober, T., Hagmann, P., Maeder, P., Marques, J., Lazeyras, F., Krueger, G., &  
616 Roche, A. (2014). Robust T1-weighted structural brain imaging and morphometry at 7T



- 617 using MP2RAGE. *PLOS ONE*, 9(6), e99676.
- 618 <https://doi.org/10.1371/JOURNAL.PONE.0099676>
- 619 Oishi, H., Takemura, H., & Amano, K. (2020). Macromolecular tissue volume mapping of lateral  
620 geniculate nucleus subdivisions in living human brains. *BioRxiv*, 2020.12.26.424373.  
621 <https://doi.org/10.1101/2020.12.26.424373>
- 622 Pelli, D. G. (1997). The VideoToolbox software for visual psychophysics: Transforming  
623 numbers into movies. *Spatial Vision*, 10(4), 437–442.  
624 <https://pubmed.ncbi.nlm.nih.gov/9176953/>
- 625 Pistorio, A. L., Hendry, S. H., & Wang, X. (2006). A modified technique for high-resolution  
626 staining of myelin. *Journal of Neuroscience Methods*, 153(1), 135–146.  
627 <https://doi.org/10.1016/J.JNEUMETH.2005.10.014>
- 628 Qian, Y., Zou, J., Zhang, Z., An, J., Zuo, Z., Zhuo, Y., Wang, D. J. J., & Zhang, P. (2020).  
629 Robust functional mapping of layer-selective responses in human lateral geniculate nucleus  
630 with high-resolution 7T fMRI. *Proceedings of the Royal Society B*, 287(1925).  
631 <https://doi.org/10.1098/RSPB.2020.0245>
- 632 Schechter, I., Butler, P. D., Silipo, G., Zemon, V., & Javitt, D. C. (2003). Magnocellular and  
633 parvocellular contributions to backward masking dysfunction in schizophrenia.  
634 *Schizophrenia Research*, 64(2–3), 91–101. [https://doi.org/10.1016/S0920-9964\(03\)00008-2](https://doi.org/10.1016/S0920-9964(03)00008-2)
- 635 Selemon, L. D., & Begovic', A. (2007). Stereologic analysis of the lateral geniculate nucleus of  
636 the thalamus in normal and schizophrenic subjects. *Psychiatry Research*, 151(1–2), 1–10.  
637 <https://doi.org/10.1016/J.PSYCHRES.2006.11.003>

- 638 Shapley, R., & Perry, V. H. (1986). Cat and monkey retinal ganglion cells and their visual  
639 functional roles. *Trends in Neurosciences*, 9(C), 229–235. <https://doi.org/10.1016/0166->  
640 2236(86)90064-0
- 641 Skalicky, S. E. (2016). The lateral geniculate nucleus. In *Ocular and visual physiology* (pp. 201–  
642 206). Springer, Singapore. [https://doi.org/10.1007/978-981-287-846-5\\_13](https://doi.org/10.1007/978-981-287-846-5_13)
- 643 Stein, J. (2001). The magnocellular theory of developmental dyslexia. *Dyslexia*, 7(1), 12–36.  
644 <https://doi.org/10.1002/DYS.186>
- 645 Stein, J., & Walsh, V. (1997). To see but not to read: The magnocellular theory of dyslexia.  
646 *Trends in Neurosciences*, 20(4), 147–152. [https://doi.org/10.1016/S0166-2236\(96\)01005-3](https://doi.org/10.1016/S0166-2236(96)01005-3)
- 647 Wang, J., Miao, W., Li, J., Li, M., Zhen, Z., Sabel, B., Xian, J., & He, H. (2015). Automatic  
648 segmentation of the lateral geniculate nucleus: Application to control and glaucoma  
649 patients. *Journal of Neuroscience Methods*, 255, 104–114.  
650 <https://doi.org/10.1016/J.JNEUMETH.2015.08.006>
- 651 Yoonessi, A., & Yoonessi, A. (2011). Functional assessment of magno, parvo and konio-cellular  
652 pathways; current state and future clinical applications. *Journal of Ophthalmic & Vision*  
653 *Research*, 6(2), 126. [/pmc/articles/PMC3306093/](https://pubmed.ncbi.nlm.nih.gov/23306093/)
- 654 Zhang, P., Zhou, H., Wen, W., & He, S. (2015). Layer-specific response properties of the human  
655 lateral geniculate nucleus and superior colliculus. *NeuroImage*, 111.  
656 <https://doi.org/10.1016/j.neuroimage.2015.02.025>
- 657 Zhang, X., Petersen, E. T., Ghariq, E., de Vis, J. B., Webb, A. G., Teeuwisse, W. M., Hendrikse,  
658 J., & van Osch, M. J. P. (2013). In vivo blood T1 measurements at 1.5 T, 3 T, and 7 T.  
659 *Magnetic Resonance in Medicine*, 70(4), 1082–1086. <https://doi.org/10.1002/MRM.24550>  
660
